# Psychiatric Services

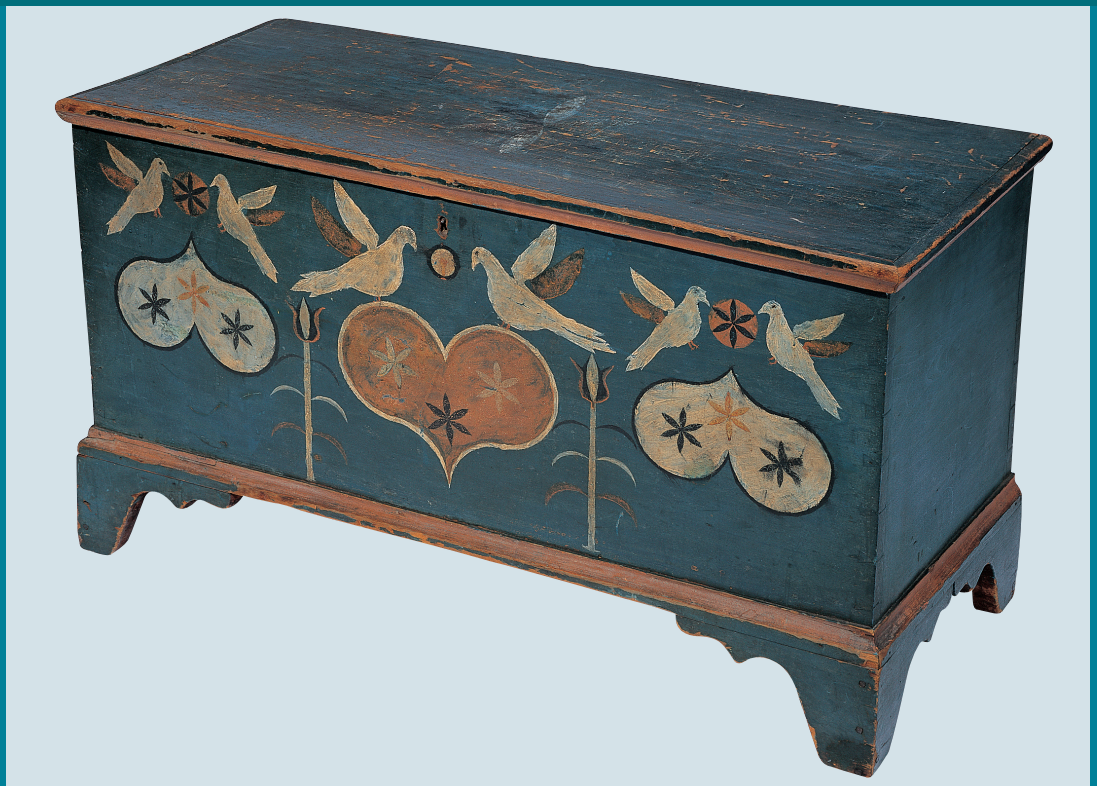

Recovery-oriented practice in inpatient settings: a literature review

Employment and income findings for Housing First participants

Changes in private plans to support integrated care and medical homes

Permanent supportive housing for transition-age youths: costs and fidelity
