Just Published!

American Psychiatric Association Publishing

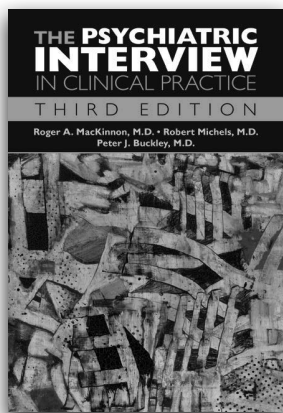

## The Psychiatric Interview in Clinical Practice, Third Edition

Roger A. MacKinnon, M.D., Robert Michels, M.D., and Peter J. Buckley, M.D.

It has been nearly a half-century since the inaugural edition of *The Psychiatric Interview in Clinical Practice*, and the book's status as a classic was again validated with the second edition a decade ago. This new, third edition maintains the book's reputation with thoroughly updated content that reflects changes brought about by the publication of DSM-5. The book presents the psychiatric interview in the context of the enormous and ongoing progress that has been made in biological and descriptive psychiatry. In addition, the book emphasizes the shift in the social

relationship between patient and clinician, recognizing that the therapeutic alliance has become the foundation of all medical treatment efforts and that patients are now better informed and seek active involvement in treatment decisions. The text reflects this growing equality and supports the clinician's efforts to nurture the relationship for optimum therapeutic outcomes. The chapter on the traumatized patient has been completely updated for this edition, and a chapter on the patient with dissociative identity disorder has been added.

*The Psychiatric Interview in Clinical Practice* will benefit mental health clinicians, both seasoned and in training, ensuring that their skills are current and their knowledge cutting-edge.

2016 • 704 pages • ISBN 978-1-61537-034-4 • Hardcover • \$79.00 • Item #37034

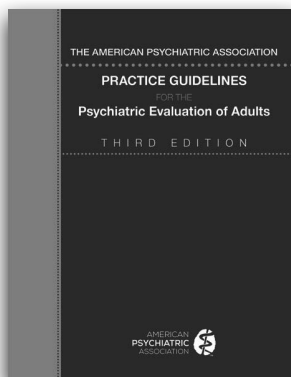

## The American Psychiatric Association Practice Guidelines for the Psychiatric Evaluation of Adults, Third Edition

American Psychiatric Association

This new edition of the practice guidelines on psychiatric evaluation for adults is the first set of the APA's guidelines developed under the new guideline development process. These guidelines address the following nine topics, in the context of an initial psychiatric evaluation: review of psychiatric symptoms, trauma history, and treatment history; substance use assessment; assessment of suicide risk; assessment for risk of aggressive behaviors;

assessment of cultural factors; assessment of medical health; quantitative assessment; involvement of the patient in treatment decision making; and documentation of the psychiatric evaluation. Each guideline recommends or suggests topics to include during an initial psychiatric evaluation. Findings from an expert opinion survey have also been taken into consideration in making recommendations or suggestions. In addition to reviewing the available evidence on psychiatry evaluation, each guideline also provides guidance to clinicians on implementing these recommendations to enhance patient care.

2016 • 170 pages • ISBN 978-0-89042-465-0 • Paperback • \$65.00 • Item #2465

2016 • 170 pages • ISBN 978-0-89042-675-3 • eBook • \$52.00 • Item #2675

Order Now

[www.appi.org](http://www.appi.org)

AMERICAN  
PSYCHIATRIC  
ASSOCIATION  
PUBLISHING

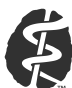

[www.appi.org](http://www.appi.org)

Email: [appi@psych.org](mailto:appi@psych.org)

Toll Free: 1-800-368-5777

20% Discount for American Psychiatric Association Members

25% Discount for APA Resident-Fellow Members

Please use Priority Code AH1553 when ordering. Find us on  and 

**Psychiatric Services** (ISSN 1075-2730; online version, 1557-9700) is published monthly by the American Psychiatric Association, editorial and executive office, 1000 Wilson Blvd., Suite 1825, Arlington, VA 22209-3901. Copyright © 2016 by the American Psychiatric Association. Printed in U.S.A. Periodicals postage paid at Arlington, VA, and at additional mailing offices. POSTMASTER: Send address changes to **Psychiatric Services, 1000 Wilson Blvd., Suite 1825, Arlington, VA 22209-3901.**

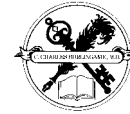

We are pleased to announce that **STEVEN S. SHARFSTEIN, M.D.** is the 2016 recipient of the **C. CHARLES BURLINGAME, M.D. AWARD** for his outstanding contributions to psychiatry.

**Past Recipients**

- 1988 Robert Kellner, M.D., Ph.D.
- 1989 William T. Carpenter, Jr., M.D.
- 1990 Dennis P. Cantwell, M.D.
- 1991 George E. Vaillant, M.D.
- 1992 A. John Rush, M.D.
- 1993 John C. Nemiah, M.D.
- 1994 Maurice J. Martin, M.D.
- 1995 Otto F. Kernberg, M.D.
- 1996 Charles P. O'Brien, M.D., Ph.D.
- 1997 Glen Owen Gabbard, M.D.
- 1998 Lissy F. Jarvik, M.D., Ph.D.
- 1999 Nancy C. Andreasen, M.D., Ph.D.
- 2000 Lewis L. Judd, M.D.
- 2001 Paul S. Appelbaum, M.D.
- 2002 Charles B. Nemeroff, M.D., Ph.D.
- 2003 Dilip V. Jeste, M.D.
- 2004 David H. Barlow, Ph.D.
- 2005 Herbert D. Kleber, M.D.
- 2006 Daniel N. Stern, M.D.
- 2007 Jerrold F. Rosenbaum, M.D.
- 2008 K. Ranga Rama Krishnan, M.D.
- 2009 David J. Kupfer, M.D.
- 2010 Professor Sir Michael Rutter
- 2011 Jeffrey A. Lieberman, M.D.
- 2012 Judith L. Rapoport, M.D.
- 2013 Nora D. Volkow, M.D.
- 2014 Daniel R. Weinberger, M.D.
- 2015 David A. Brent, M.D.

**Institute of Living**  
 A Division of Hartford Hospital  
 200 Retreat Avenue  
 Hartford, CT 06106  
 1-800-673-2411

**The Psychoanalytic Model of the Mind**

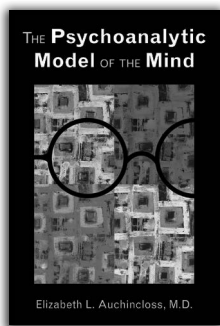

*Elizabeth L. Auchincloss, M.D.*  
*The Psychoanalytic Model of the Mind* represents an important breakthrough: in simple language, it presents complicated ideas and concepts in an accessible manner, demystifies psychoanalysis, debunks some of the myths that have plagued it, and defuses the controversies that have too long attended it. The author effectively demonstrates that the psychoanalytic model of the mind is consistent with a brain-based approach.

2015 • 332 pages • ISBN 978-1-58562-471-3 • Paperback • \$62.00 • Item #62471  
 2015 • 332 pages • ISBN 978-1-58562-545-1 • eBook • \$49.95 • Item #62545

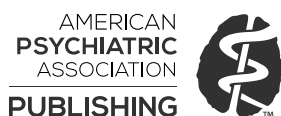

Order Online: [www.appi.org](http://www.appi.org)  
 Phone: 703-907-7322  
 Toll Free: 1-800-368-5777  
 Email: [appi@psych.org](mailto:appi@psych.org)

20% Discount for American Psychiatric Association Members  
 25% Discount for APA Resident-Fellow Members

AH1561A

**UNMATCHED GROWTH OPPORTUNITIES**

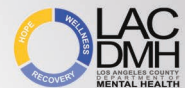

"Working at DMH provides security, stability, great benefits, and flexibility. They also offer a generous salary and opportunity for career advancement at every level. It's a challenging environment, but there's so much support that has really helped with my professional growth."

**Anna Xiao, MD**  
Psychiatrist



"DMH offers a very good work-life balance, and I'm able to grow professionally without sacrificing my personal life. Another advantage is not being buried in endless paperwork. I'm free to provide the services I think are necessary to my clients."

**V. Dorina Trufasu, MD**  
Psychiatrist & Internal Medicine



The Los Angeles County Department of Mental Health has immediate openings with Jail Mental Health Services, Juvenile Justice Correctional Facilities, Antelope Valley, and directly operated programs. This is your chance to join the leading mental health agency in the nation and work in a safe, diverse, and challenging environment. Our entire department is filled with opportunities for professional development and growth, and is expanding exponentially with 27 new full-time psychiatrist positions. We offer competitive salaries with potential bonuses up to \$30,000\* a year, depending on qualifications and placement, plus up to 24 hours a week is allowed for outside employment.

\*Based on CEO approval at step 15 of the mental health psychiatrist salary schedule.

[www.psychiatristjobs.la](http://www.psychiatristjobs.la)

# The Social Determinants of Mental Health

Edited by Michael T. Compton, M.D., M.P.H., and  
Ruth S. Shim, M.D., M.P.H.

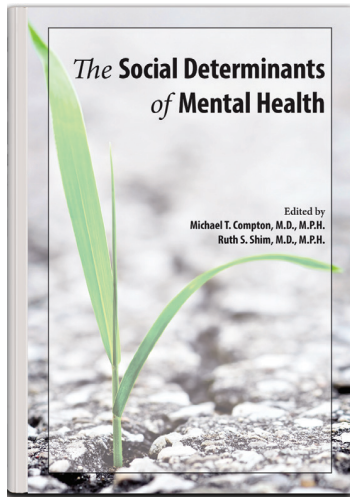

This book provides a foundation of knowledge on the social and environmental underpinnings of mental health and mental illnesses for clinical and policy decision making, with a goal to improve the mental health of individuals across diverse communities and the mental health of the nation as a whole. The basic premise of this book is that society plays a prominent role in creating and shaping mental illnesses and thus is in a position to improve mental health and reduce risk for mental illnesses. Where an individual, family, community, or society is located on the continuum from health and wellness to illness and infirmity is multidetermined. Although genetic influences and biological factors are key drivers of health and wellness, the contexts of the individual, family, community, and society are also crucial.

*The Social Determinants of Mental Health* provides psychiatrists, psychologists, residents, medical students, policymakers, and allied mental health professionals with practical information in an accessible format for incorporating social and environmental determinants of mental health into practice and policy decision making, empowering them to act to build a culture of positive mental health and wellness.

Students preparing for the Medical College Admission Test (MCAT) will also benefit from this book, as the MCAT in 2015 will test applicants' knowledge of the social determinants of health. The social determinants of mental health are not distinct from the social determinants of physical health, although they deserve special emphasis given the prevalence and burden of poor mental health.

2015 • 294 pages • ISBN 978-1-58562-477-5 • Paperback • \$59.00 • Item #62477

2015 • 294 pages • ISBN 978-1-58562-517-8 • eBook • \$47.00 • Item #62517

**20% Discount for American Psychiatric Association Members**  
**25% Discount for APA Resident-Fellow Members**
